# Supplementary material for: The Rat microRNA body atlas; Evaluation of the microRNA content of rat organs through deep sequencing and characterization of pancreas enriched miRNAs as biomarkers of pancreatic toxicity in the rat and dog
Source: PubMed Central journal article supplement (PMC5006322; doi:10.1186/s12864-016-2956-z), 2016-08-30

# Deep sequencing and qPCR inconsistency

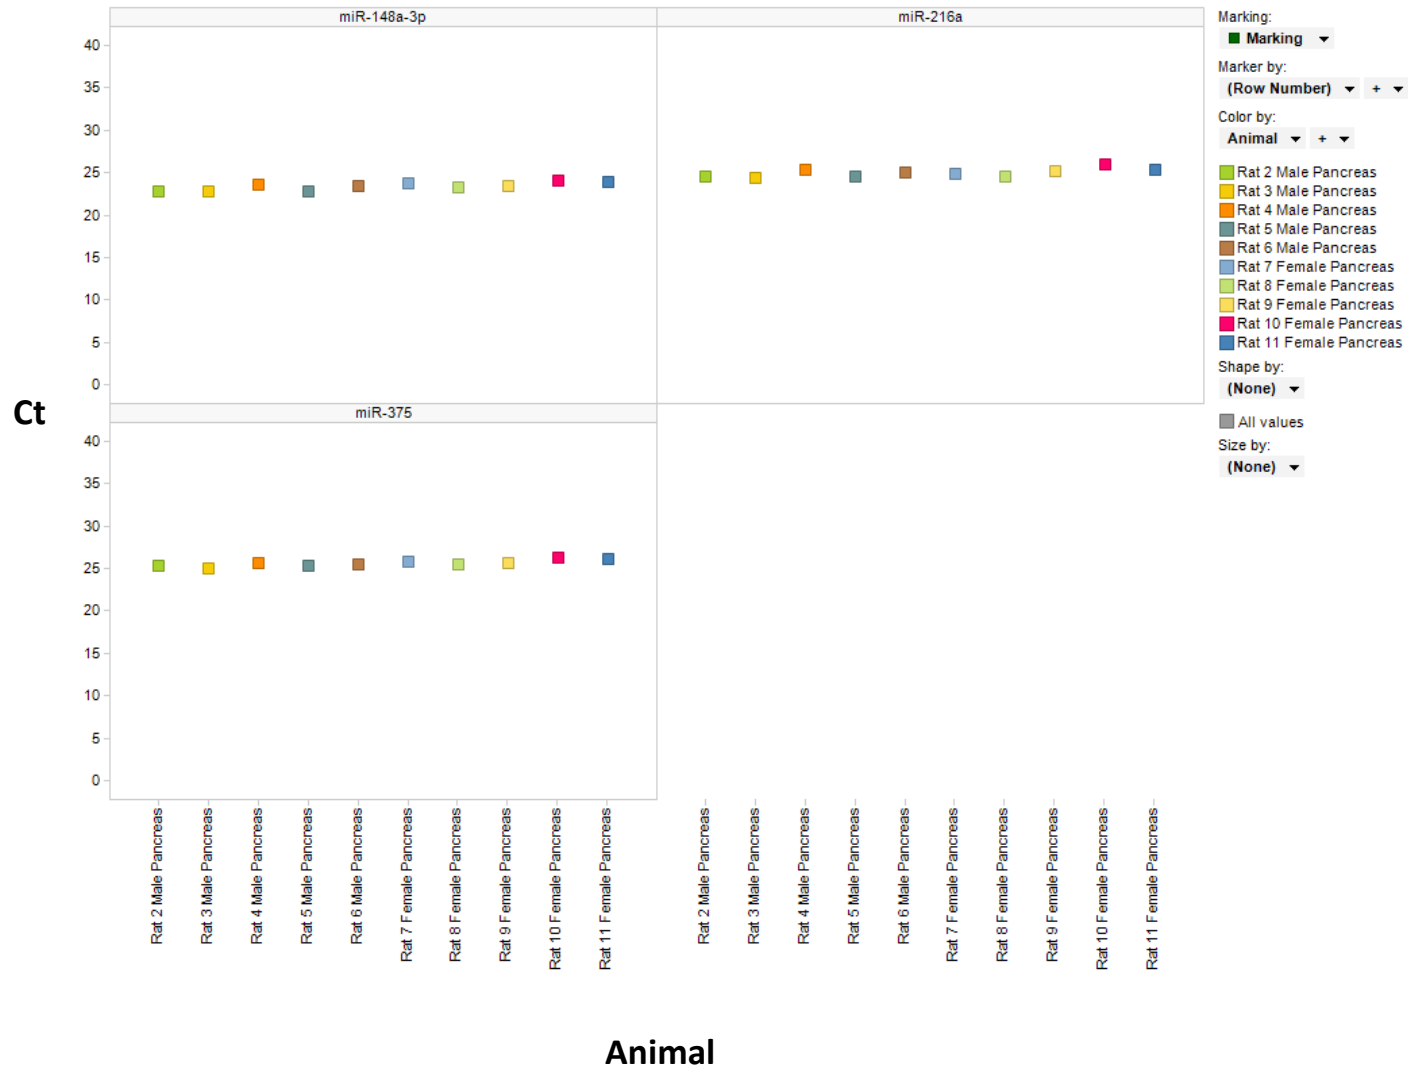

Supplement: 12864_2016_2956_MOESM18_ESM.pdf [file 12864_2016_2956_MOESM18_ESM.pdf]
